# Supplementary material for: Treatment retention of infliximab and etanercept originators versus their corresponding biosimilars: Nordic collaborative observational study of 2334 biologics naïve patients with spondyloarthritis
Source: PubMed Central journal article supplement — RMD Open. 2019 Oct 23;5(2):e001079. doi: 10.1136/rmdopen-2019-001079 (PMC6827791; doi:10.1136/rmdopen-2019-001079), 2019-10-23
Supplement: rmdopen-2019-001079supp001.pdf [file rmdopen-2019-001079supp001.pdf]

| <b>Supplementary Table 1.</b>                                                                                                                                                                                                                                                                                                                                                  |                      |                |                      |             |
|--------------------------------------------------------------------------------------------------------------------------------------------------------------------------------------------------------------------------------------------------------------------------------------------------------------------------------------------------------------------------------|----------------------|----------------|----------------------|-------------|
| Available data at baseline and 6 months of follow-up in infliximab and etanercept treated SpA patients shown as percentages                                                                                                                                                                                                                                                    |                      |                |                      |             |
|                                                                                                                                                                                                                                                                                                                                                                                | Infliximab<br>N=1319 |                | Etanercept<br>N=1015 |             |
|                                                                                                                                                                                                                                                                                                                                                                                | INF (N=320)          | CT-P13 (N=999) | ETN (N=493)          | SB4 (N=522) |
| <b>Baseline</b>                                                                                                                                                                                                                                                                                                                                                                |                      |                |                      |             |
| Age, years                                                                                                                                                                                                                                                                                                                                                                     | 100%                 | 100%           | 100%                 | 100%        |
| Disease duration, years                                                                                                                                                                                                                                                                                                                                                        | 89%                  | 55%            | 77%                  | 88%         |
| Sex                                                                                                                                                                                                                                                                                                                                                                            | 100%                 | 100%           | 100%                 | 100%        |
| AS, nrax-SpA or uSpA                                                                                                                                                                                                                                                                                                                                                           | 100%                 | 100%           | 100%                 | 100%        |
| Psoriasis*                                                                                                                                                                                                                                                                                                                                                                     | 98%                  | 83%            | 97%                  | 97%         |
| Inflammatory bowel disease*                                                                                                                                                                                                                                                                                                                                                    | 98%                  | 83%            | 97%                  | 97%         |
| CRP                                                                                                                                                                                                                                                                                                                                                                            | 61%                  | 70%            | 62%                  | 60%         |
| Patient global                                                                                                                                                                                                                                                                                                                                                                 | 51%                  | 66%            | 54%                  | 57%         |
| Patient pain                                                                                                                                                                                                                                                                                                                                                                   | 52%                  | 66%            | 57%                  | 57%         |
| ASDAS                                                                                                                                                                                                                                                                                                                                                                          | 37%                  | 55%            | 35%                  | 39%         |
| BASDAI, mm                                                                                                                                                                                                                                                                                                                                                                     | 45%                  | 60%            | 43%                  | 46%         |
| BASFI, mm                                                                                                                                                                                                                                                                                                                                                                      | 40%                  | 51%            | 39%                  | 40%         |
| Concomitant csDMARD**                                                                                                                                                                                                                                                                                                                                                          | 68%                  | 78%            | 69%                  | 72%         |
| Reason for discontinuation                                                                                                                                                                                                                                                                                                                                                     | 100%                 | 100%           | 100%                 | 100%        |
| <b>6 months follow-up</b>                                                                                                                                                                                                                                                                                                                                                      |                      |                |                      |             |
| CRP                                                                                                                                                                                                                                                                                                                                                                            | 69%                  | 80%            | 71%                  | 61%         |
| Patient global                                                                                                                                                                                                                                                                                                                                                                 | 65%                  | 83%            | 62%                  | 62%         |
| Patient pain                                                                                                                                                                                                                                                                                                                                                                   | 66%                  | 81%            | 65%                  | 62%         |
| ASDAS                                                                                                                                                                                                                                                                                                                                                                          | 52%                  | 70%            | 41%                  | 48%         |
| BASDAI                                                                                                                                                                                                                                                                                                                                                                         | 55%                  | 78%            | 48%                  | 53%         |
| <b>Available at both baseline and 6 months follow-up</b>                                                                                                                                                                                                                                                                                                                       |                      |                |                      |             |
| CRP                                                                                                                                                                                                                                                                                                                                                                            | 45%                  | 59%            | 44%                  | 35%         |
| Patient global                                                                                                                                                                                                                                                                                                                                                                 | 36%                  | 60%            | 39%                  | 34%         |
| Patient pain                                                                                                                                                                                                                                                                                                                                                                   | 36%                  | 60%            | 42%                  | 34%         |
| ASDAS                                                                                                                                                                                                                                                                                                                                                                          | 23%                  | 47%            | 21%                  | 23%         |
| BASDAI                                                                                                                                                                                                                                                                                                                                                                         | 29%                  | 55%            | 28%                  | 25%         |
| Abbreviations: AS: ankylosing spondylitis; ASDAS= ankylosing spondylitis disease activity score; BASDAI: Bath ankylosing spondylitis disease activity index; csDMARD = conventional synthetic Disease Modifying anti-Rheumatic Drugs; CRP=C-reactive protein; INF= infliximab originator; CT-P13= infliximab biosimilar; ETN= etanercept originator; SB4 etanercept biosimilar |                      |                |                      |             |
| *Comorbidities only available from Sweden, Denmark and Finland, percentage thus calculated as the proportion of patients in the whole cohort living in these countries.                                                                                                                                                                                                        |                      |                |                      |             |
| **Missing data on csDMARD is due to patients missing a visit within the specified time-frame defined as baseline.                                                                                                                                                                                                                                                              |                      |                |                      |             |
